# Supplementary material
Source: PubMed Central journal article supplement (PMC3193463)
Supplement: cr201181x1.pdf [file cr201181x1.pdf]

Supplementary information, Figure S1

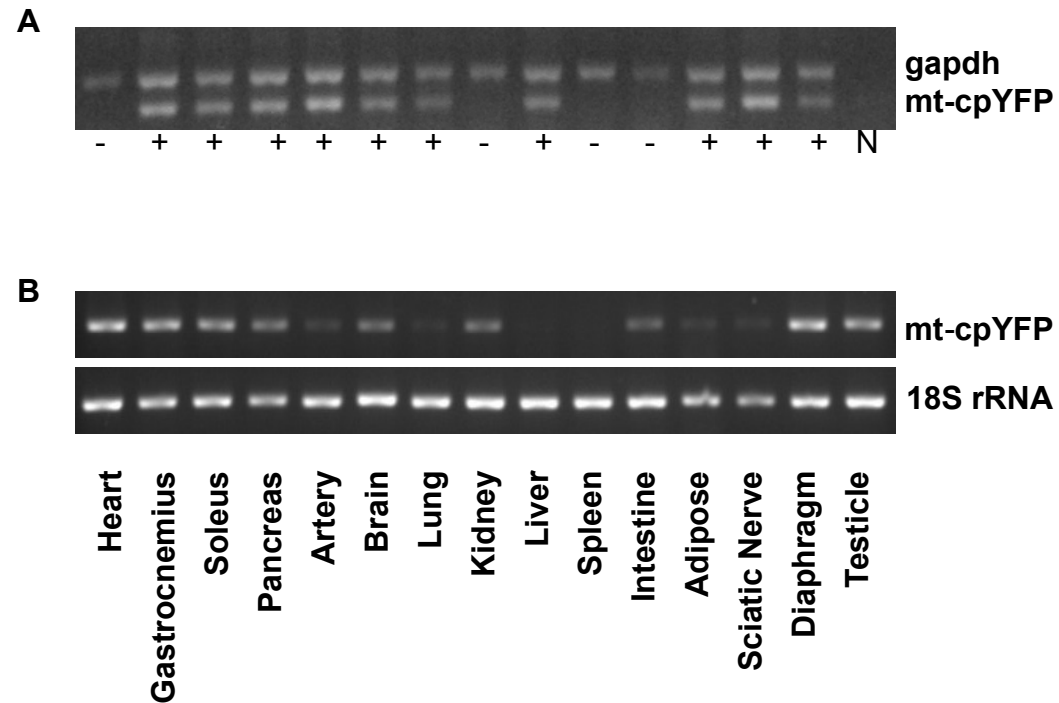

**Figure S1** (A) PCR analysis of genomic DNA from the tails of wild type (marked by -) and *mt-cpYFP* transgenic (marked by +) mice, the negative control of the PCR system is also shown (marked by N). The PCR products of *mt-cpYFP* and *gapdh* were 394 and 530 bp fragments, respectively. (B) Reverse transcription PCR analysis showing expression of *mt-cpYFP* mRNA in many, but not all, tissues from *mt-cpYFP* transgenic mice.
