# Supplementary material
Source: PubMed Central journal article supplement (PMC3193463)
Supplement: cr201181x3.pdf [file cr201181x3.pdf]

Supplementary information, Figure S3

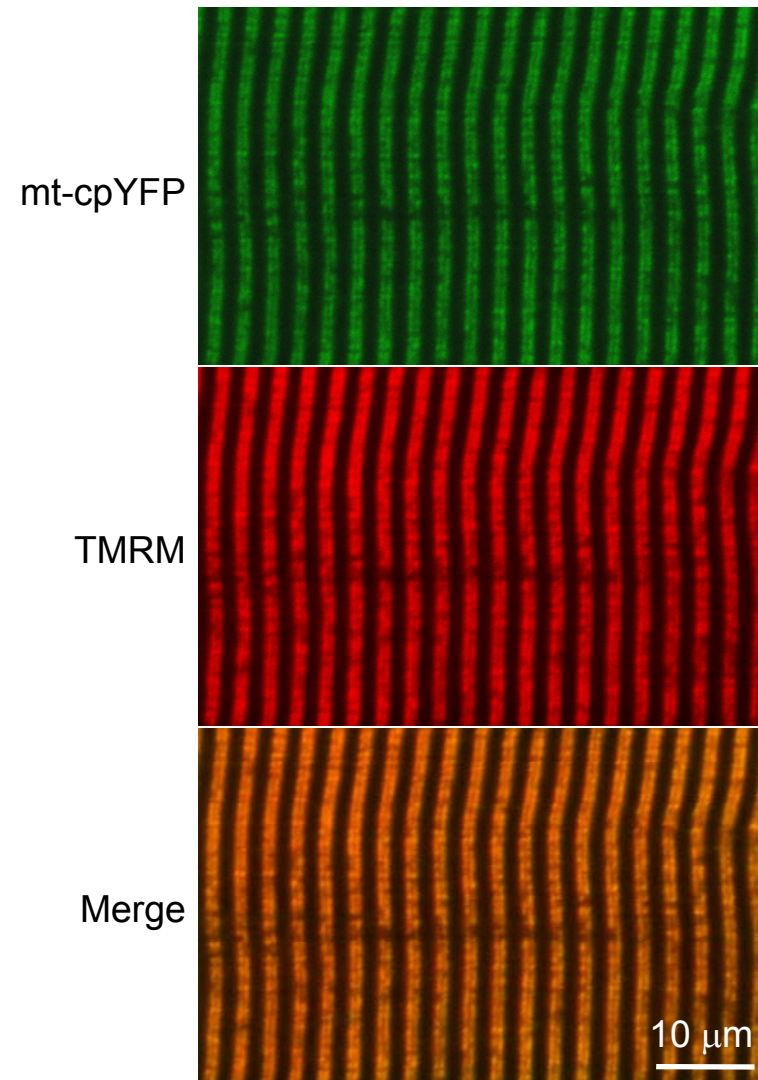

**Figure S3** Colocalization of mt-cpYFP and TMRM to skeletal muscle mitochondria. See Methods for *in vivo* loading of TMRM into skeletal muscle fibers.
